# Supplementary material
Source: PubMed Central journal article supplement (PMC3523868)
Supplement: 1213764109_pnas.201213764SI.pdf [file 1213764109_pnas.201213764SI.pdf]

# Supporting Information

Sandhu et al. 10.1073/pnas.1213764109

## SI Materials and Methods

**Retrovirus.** Full-length cDNA of HDAC4 and BCL6 was cloned into Murine Stem Cell Virus (MSCV) containing IRES and GFP (pMIG). Retrovirus was produced in Phoenix cells maintained in DMEM with 10% (vol/vol) FBS. DLBCL cell lines were transduced with 2 mL of virus per  $1 \times 10^6$  by spin-infection with 10  $\mu$ g/mL polybrene (SCBT). Briefly, the cells containing virus were centrifuged at 37 °C at  $930 \times g$  for 90 min, and incubated with virus for additional 4–5 h, after which it was replaced with fresh media for recovery overnight. After 3–4 d, GFP positive cells were sorted using BD FACs Aria and cultured for colony formation, apoptosis and proliferation assays.

**Luciferase Reporter Assay.** miR-155 target prediction was according to the Targetscan [Release 3.0 (1)] and RNA22 algorithms (<http://cbsrv.watson.ibm.com/rna22.html>) (2). The 3'UTR of the human and mouse HDAC4 and BCL6 containing the two miR-155 binding sites was PCR amplified with *Xba*I flanked primers. The PCR products were purified, digested, and cloned downstream of the luciferase coding region in the pGL3 control vector (Promega). Human HEK293T, HeLa, Jurkat, and mouse NIH 3T3 cells were cotransfected with respective luciferase constructs and miR-155 or scrambled (Scr) oligos along with Renilla luciferase expression plasmid (pRL-TK) as a transfection control using Lipofectamine (Invitrogen). Deletion and mutant HDAC4 luciferase constructs were prepared by deleting the miR-155 binding sites in the original 3'UTR construct, respectively. After 48 h, cells were lysed and analyzed for relative luciferase activity using the Dual Luciferase Assay Kit (Promega). Results are representative of three independent experiments.

The primer sequences for luciferase constructs are as follows:

hsHdac4\_WT3utr\_L: ACCTCTAgAagATTCTATTTTCAG-AAAgtgAgAg; hsHdac4\_WT3utr\_R: ACCTCTAgAagggTT-TCCCTCAAaggATATAA; mmHdac4\_3utr\_L: ACCTC-TAGAACATCATGAGAGGGGAAAGAAA; mmHdac4\_WT3utr\_R: ACCTCTAGAGAGCTAAGACAGAGGGTGG-AGA; mmBcl6\_WT3utr\_L: AACtctagaGACTTTTCAATGTT-TTATTCTTATGTTTTGTACA; mmBcl6\_WT3utr\_R: AAC-tctagaATGAAGCATGGAGTGTTTCT; hsBcl6\_WT3utr\_L:

AACtctagaCCAGTTTGACTTTTCAACATTTTATTCTT-ATATT; hsBcl6\_WT3utr\_R: AACtctagaAGCATGGAGT-GTTGATGCTTT); hsHdac4\_m155Del7-mer\_L: AGCTT-CACAAATGTGCTGAGCTGTGTAGCCTTTCTTTGA; hsHdac4\_m155Del7-mer\_R: TCAAAGAAAAGGCTACAC-AGCTCAGCACATTTGTGAAGCT); hsHdac4\_m155Mut7-mer\_L: CACAAATgTgCTgAggAACATACTgTgTAgCCTT-TTC; and hsHdac4\_m155Mut7mer\_R: gAAAAGgCTACA-CAgTATgTTCCTCAgCACATTTgTg).

**qRT-PCR.** For qRT-PCR total mRNA from sorted cells was isolated using Phenol-free total RNA isolation kit (Amresco) and reverse transcribed using iScript first strand cDNA synthesis kit. About 1/20th of diluted cDNA was used for gene taqman analysis using respective taqman assays for mouse or human *Hdac4*, *Bcl6*, *cMyc*, and *Mxd1* (ActinB was used as normalizer). For miR expression analysis, total RNA was reverse transcribed using Taq-Man miRNA reverse transcription kit using the manufacturer's protocol, followed by miRNA RT-PCR for miR-155 and sno-135 (normalizer). BCL6 target genes (*IL6*, *Id2*, *Ccnd1*, and *Ccl3/Mipla*) were detected using sybr-green-based RT-PCR using primers picked from the RTprimer database (<http://medgen.ugent.be/rtpimerdb/>). The list of primers are as follows: mActin\_ForSybr: ATG CTC CCC GGG CTG TAT; mActin\_RevSybr: CAT AGG AGT CCT TCT GAC CCA TTC; mId2\_ForSybr: AAG ACT TTT GTT ATC AGC CAT TT; mId2\_RevSybr: GAC GAT CAT CCT TAG TTT TCC CGC TTT CTT; mIL6\_ForSybr: TCC AGT TGC CTT CTT GGG AC; mIL6\_RevSybr: GTG TAA TTA AGC CTC CGA CTT G; mCCL3\_ForSybr: CGT TCC TCA ACC CCC ATC; and mCCL3\_RevSybr: TGT CAG TTC ATG ACT TTG TCA TCA T. All RT-PCR assays were performed on the Biorad CFX96. Data were analyzed using  $2^{-\Delta Ct}$  method to calculate the relative amounts or  $2^{-\Delta\Delta Ct}$  for fold change. The overlap between up-regulated genes in mice and known BCL6 targets (3) in humans was calculated using Gene Cluster 3.0. The clustered genes were mean centered, and average linkage was performed using Euclidean distance, after filtering the genes with  $SD > 1$ .

1. Lewis BP, Burge CB, Bartel DP (2005) Conserved seed pairing, often flanked by adenosines, indicates that thousands of human genes are microRNA targets. *Cell* 120(1): 15–20.
2. Lewis BP, Shih IH, Jones-Rhoades MW, Bartel DP, Burge CB (2003) Prediction of mammalian microRNA targets. *Cell* 115(7):787–798.

3. Basso K, et al. (2010) Integrated biochemical and computational approach identifies BCL6 direct target genes controlling multiple pathways in normal germinal center B cells. *Blood* 115(5):975–984.
